# Supplementary figures and images for: Beyond excise taxes: a systematic review of literature on non-tax policy approaches to raising tobacco product prices
Source: HighWire-hosted journal article supplement (doi:10.1136/tobaccocontrol-2015-052294), 2015-09-21

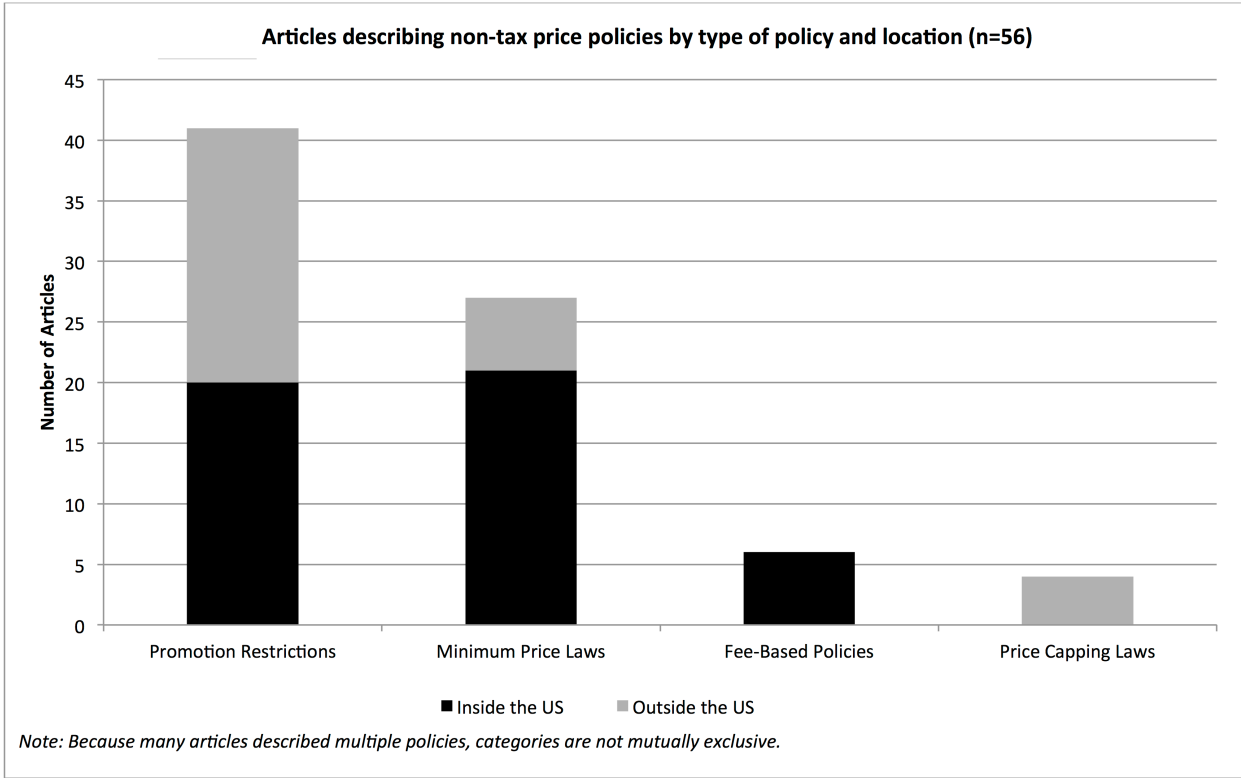

[Note: to accommodate the new Figure 3, we recommend removing this, or switching it to online-only.]

Supplement: tobaccocontrol-2015-052294supp.pdf [file tobaccocontrol-2015-052294supp.pdf]
